# Supplementary material
Source: Frontiers journal article supplement (https://www.frontiersin.org/articles/374346)
Supplement: Image_1.pdf [file Image_1.pdf]

**Supplementary Figure S1. Amnesic/non-amnesic x probable/possible MCI flowchart.** (Espinosa et al., 2013; Lopez et al., 2003; Petersen, 2004)

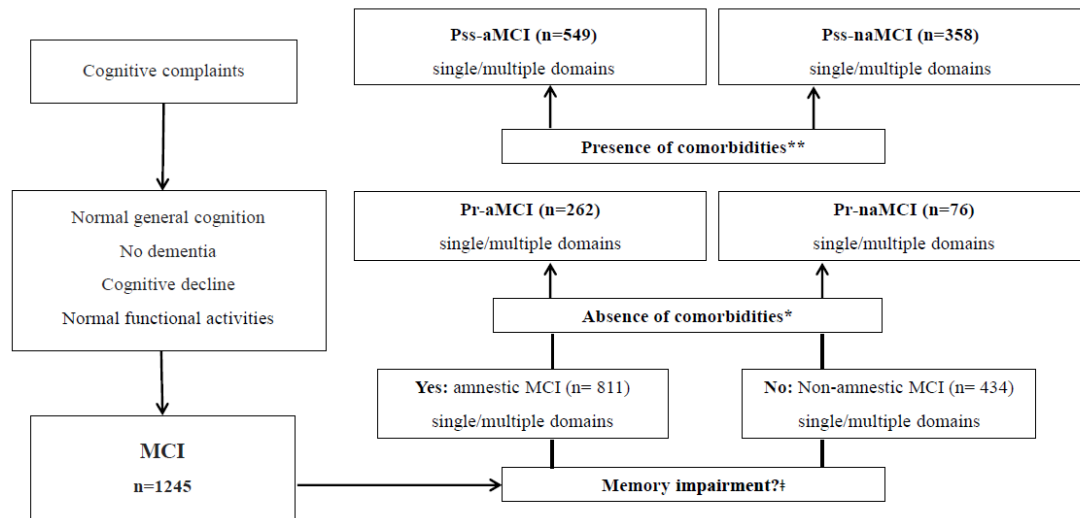

\*: i.e., cerebrovascular disease, psychiatric disorders, history of head trauma encephalopathy, infectious diseases, or developmental disabilities that could themselves cause cognitive deficits; \*\*: only when cerebrovascular disease, anxiety or depression was suspected; ‡: measurable impairment in memory function, by TheWord List Learning test from the WMS-III with or without a deficit in other cognitive domains.
